# Supplementary material for: Clinical Assessment of Thermotherapy Applications during Hepatectomy and Laparotomy in Sturgeon (Acipenser ruthenus): Impact on Bioparameter Variations Based on Liver Condition
Source: MDPI journal article supplement (doi:10.3390/vetsci10120682), 2023-12-01
Supplement: s1 [file s1]

**Supplementary Materials:** Figure S1: Histological results of other organs.

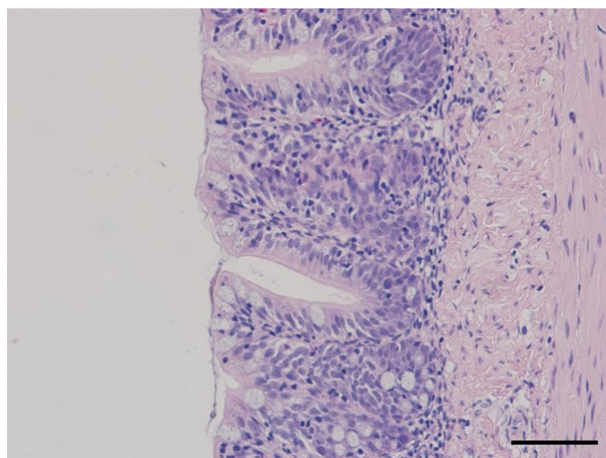

Anus (hindgut)

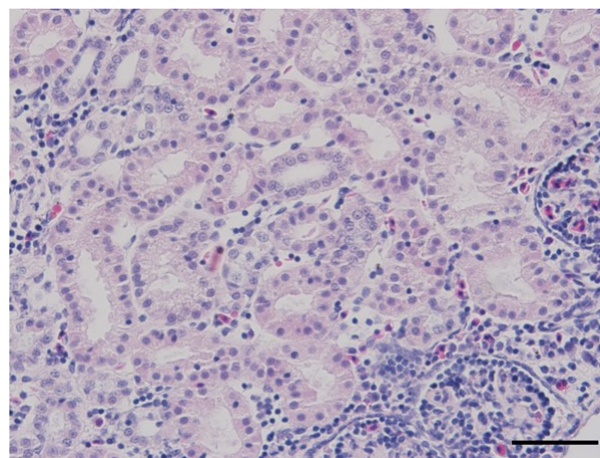

Body kidney

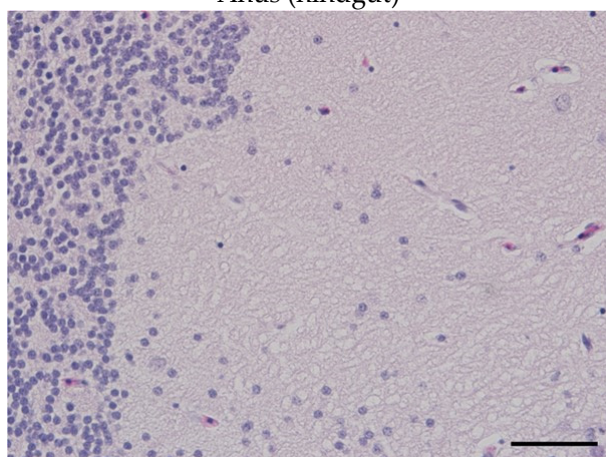

Brain (cerebellum)

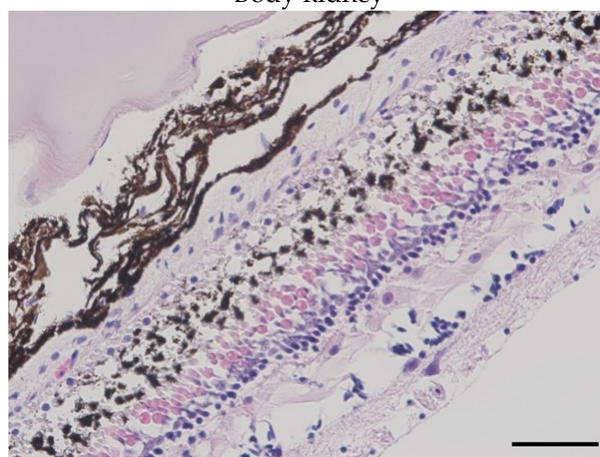

Eye

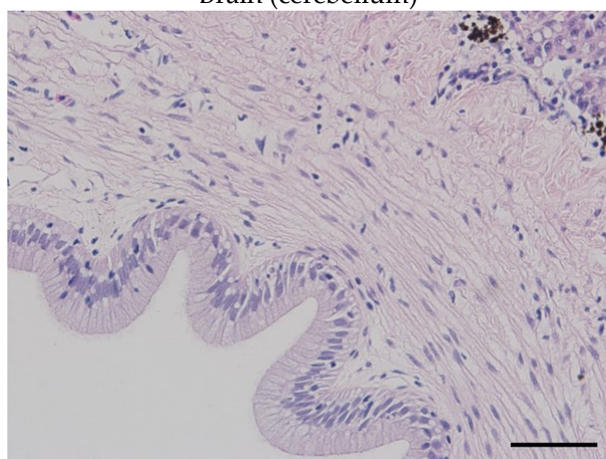

Gall bladder

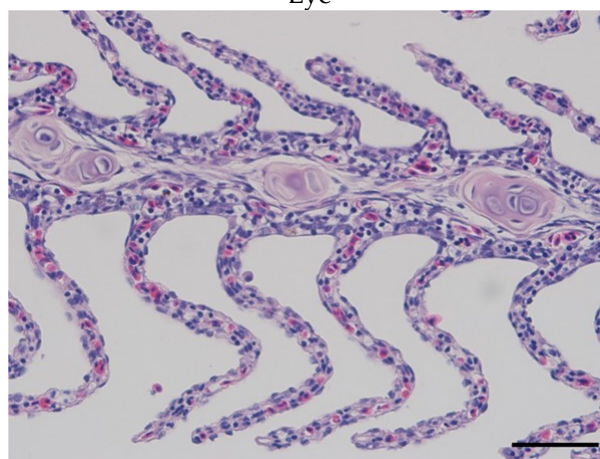

Gill



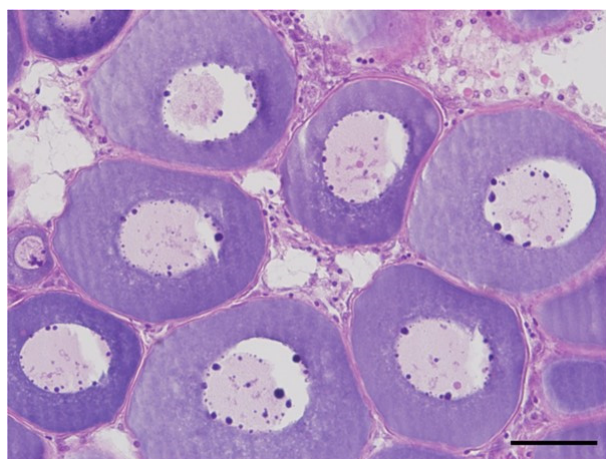

Gonad (ovary)

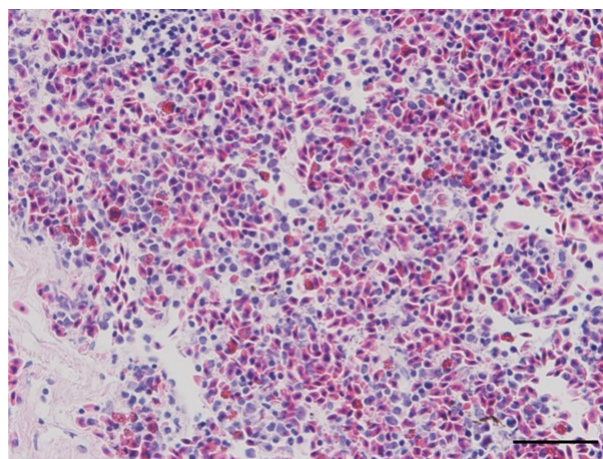

Head kidney

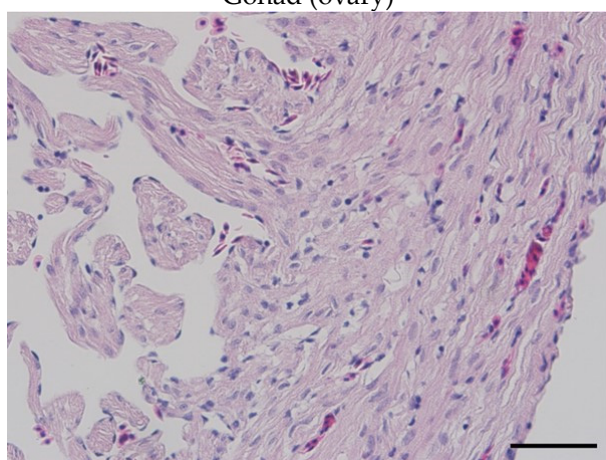

Heart

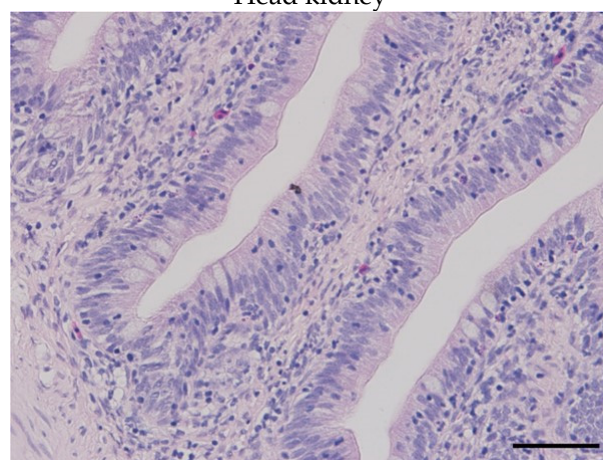

Intestine

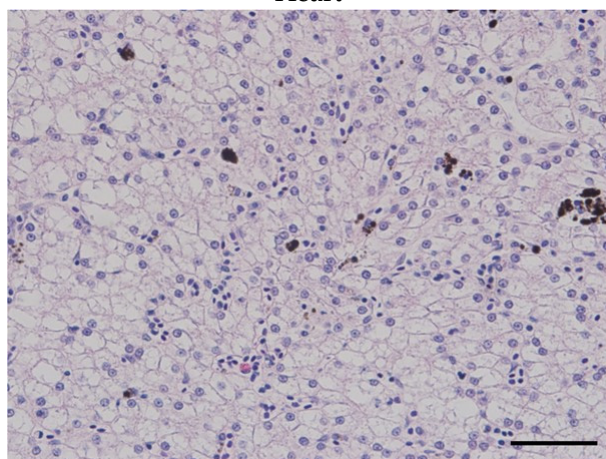

Liver

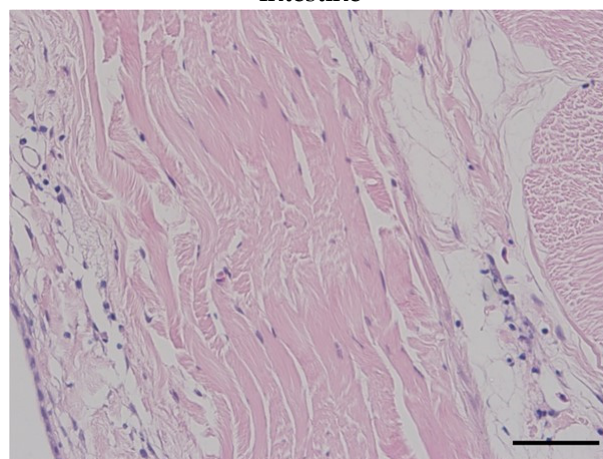

Muscle



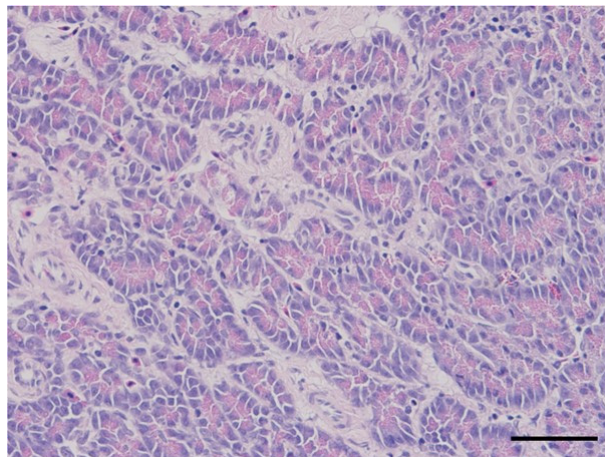

Pancreas

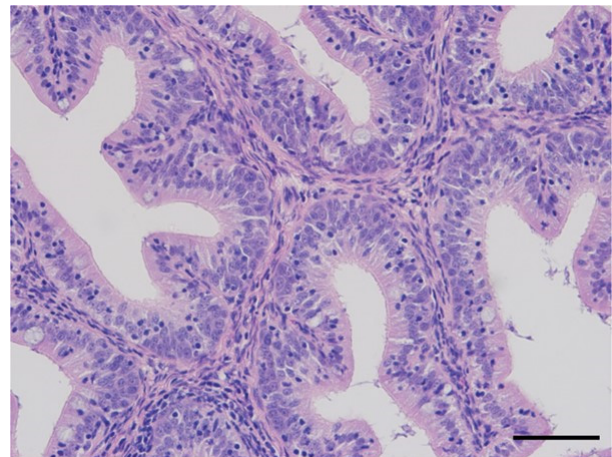

Pyloric caeca

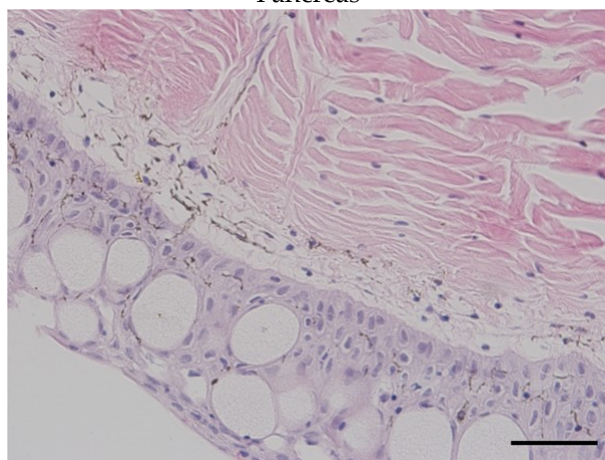

Skin

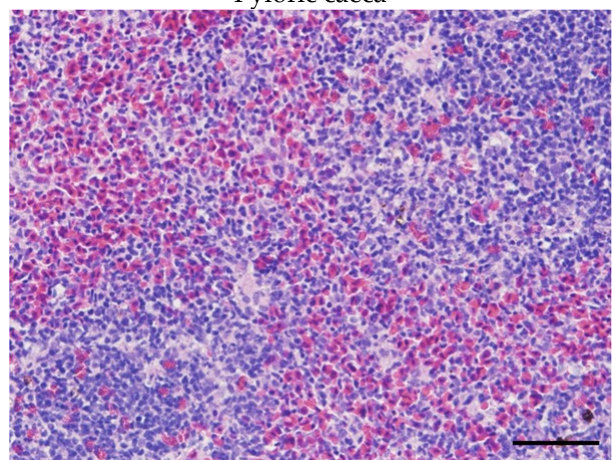

Spleen

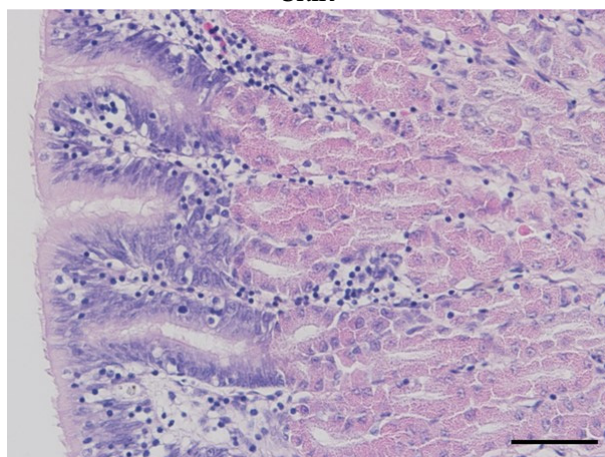

Stomach

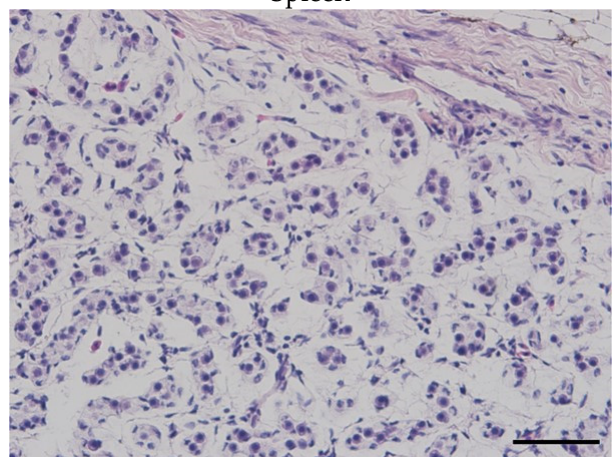

Swim bladder

**Figure S1.** Other organs: anus (hindgut), body kidney, brain, eye, gall bladder, gill, gonad, head kidney, heart, intestine, liver, muscle, pancreas, pyloric caeca, skin, spleen, stomach, and swim bladder (Scale bar = 50  $\mu$ m).
